# Supplementary material for: Identifying genes within pathways in unannotated genomes with PaGeSearch
Source: Genome Res. 2024 May;34(5):784–95. doi: 10.1101/gr.278566.123 (PMC11216310; doi:10.1101/gr.278566.123)
Supplement: Supplement 2 [file Supplemental_Table_S2.xlsx]

## Sheet: Sheet1
Supplementary Table S2. The archetype species, test species, and the assembly accessions of the genomes used to test the performance of PaGeSearch in different assembly levels.
Archetype species	Test species	Assembly level	Accession
Homo_sapiens	Mus_musculus	scaffold	GCA_003774525.2
Homo_sapiens	Mus_musculus	contig	GCA_000181195.1
Triticum_aestivum	Oryza_saztiva	scaffold	GCA_022834795.1
Triticum_aestivum	Oryza_saztiva	contig	GCA_034317485.1
Arabidopsis_thaliana	Phaseolus_vulgaris	scaffold	GCA_016509735.1
Arabidopsis_thaliana	Phaseolus_vulgaris	contig	GCA_016509755.1
Danio_rerio	Oryzias_latipes	scaffold	GCA_947078815.1
Danio_rerio	Oryzias_latipes	contig	GCA_905309395.1
Arabidopsis_thaliana	Solanum_tuberosum	scaffold	GCA_022337925.1
Arabidopsis_thaliana	Solanum_tuberosum	contig	GCA_009849745.1
