# Supplementary material for: Identifying genes within pathways in unannotated genomes with PaGeSearch
Source: Genome Res. 2024 May;34(5):784–95. doi: 10.1101/gr.278566.123 (PMC11216310; doi:10.1101/gr.278566.123)
Supplement: Supplement 3 [file Supplemental_Table_S1.xlsx]

## Sheet: Sheet1
Supplementary Table S1. The common name, scientific name, NCBI taxon ID, assembly name, genome accession, Ensembl annotation version of Gff, and remarks of the species used in the PaGeSearch model training and benchmark.
Usage	Common name	Scientific name	Taxon ID	Ensembl Assembly	Accession	Annotation version	Remarks
Model training	Human	Homo sapiens	9606	GRCh38.p13	GCA_000001405.28	Ensembl Release 110
	Macaque	Macaca mulatta	9544	Mmul_10	GCA_003339765.3	Ensembl Release 110
	Platypus	Ornithorhynchus anatinus	9258	mOrnAna1.p.v1	GCA_004115215.2	Ensembl Release 110
	Zebrafish	Danio rerio	7955	GRCz11	GCA_000002035.4	Ensembl Release 110
	Common carp	Cyprinus carpio carpio	630221	Cypcar_WagV4.0	GCA_905221575.1	Ensembl Release 110
	Spotted gar	Lepisosteus oculatus	7918	LepOcu1	GCA_000242695.1	Ensembl Release 110
	Chicken	Gallus gallus	9031	bGalGal1.mat.broiler.GRCg7b	GCA_016699485.1	Ensembl Release 110
	Turkey	Meleagris gallopavo	9103	Turkey_5.1	GCA_000146605.4	Ensembl Release 110
	Zebra finch	Taeniopygia guttata	59729	bTaeGut1_v1.p	GCA_003957565.2	Ensembl Release 110
	Thale cress	Arabidopsis thaliana	3702	TAIR10	GCA_000001735.1	Ensembl Plants Release 58
	Wild cabbage	Brassica oleracea	109376	BOL	GCA_000695525.1	Ensembl Plants Release 58
	Tomato	Solanum lycopersicum	4081	SL3.0	GCA_000188115.3	Ensembl Plants Release 58
	Bread wheat	Triticum aestivum	4565	IWGSC	GCA_900519105.1	Ensembl Plants Release 58
	Barley	Hordeum vulgare	112509	MorexV3_pseudomolecules_assembly	GCA_904849725.1	Ensembl Plants Release 58
	Corn	Zea mays	4577	Zm-B73-REFERENCE-NAM-5.0	GCA_902167145.1	Ensembl Plants Release 58
Benchmark	Mouse	Mus musculus	10090	GRCm39	GCA_000001635.9	Ensembl Release 110
	Cow	Bos taurus	9913	ARS-UCD1.2	GCA_002263795.2	Ensembl Release 110
	Mexican tetra	Astyanax mexicanus	7994	Astyanax_mexicanus-2.0	GCA_000372685.2	Ensembl Release 110
	Japanese medaka	Oryzias latipes	8090	ASM223467v1	GCA_002234675.1	Ensembl Release 110
	Duck	Anas platyrhynchos platyrhynchos	8840	CAU_duck1.0	GCA_002743455.1	Ensembl Release 110
	Great Tit	Parus major	9157	Parus_major1.1	GCA_001522545.2	Ensembl Release 110
	French bean	Phaseolus vulgaris	3885	PhaVulg1_0	GCA_000499845.1	Ensembl Plants Release 58
	Potato	Solanum tuberosum	4113	SolTub_3.0	GCA_000226075.1	Ensembl Plants Release 58	scaffold-level assembly
	Cultivated oat	Avena sativa OT3098	4498	Oat_OT3098_v2	GCA_022788535.1	Ensembl Plants Release 58	allohexaploid (2n=6x)
	Japonica rice	Oryza sativa Japonica Group	39947	IRGSP-1.0	GCA_001433935.1	Ensembl Plants Release 58
